# Supplementary material
Source: bioRxiv or medRxiv preprint supplement (https://www.biorxiv.org/highwire/filestream/107717/field_highwire_adjunct_files/2/355669-2.pdf)
Supplement: Supplementary file [file 355669-2.pdf]

1 **Supplementary information**

2

3 **Supplementary Table 1 Output from edgeR v3.20.1<sup>53</sup> with gene expression**  
4 **(Fragments Per Kilobase of transcript per Million mapped reads [FPKM]) for *O.***  
5 ***fasciatus* ovaries ds-*dnmt1* and control biological and technical replicates.**

6

7 **Supplementary Table 2 Output from edgeR v3.20.1<sup>53</sup> with gene expression (FPKM)**  
8 **for *O. fasciatus* gut, head, and thorax ds-*dnmt1* and control biological replicates.**

9

10 **Supplementary Table 3 Gene expression FPKM for *A. mellifera* queen and drone**  
11 **brains.**

12

13 **Supplementary Table 4 Gene expression (FPKM) for *Z. nevadensis* female worker at**  
14 **the final instar larva.**

15

16 **Supplementary Table 5 DNA methylation summary statistics for all species**  
17 **investigated in this study.**

18

19 **Supplementary Table 6 Output General Features File (GFF) from RepeatMasker**  
20 **v4.0.5 (<http://www.repeatmasker.org>).**

21

22 **Supplementary Table 7 Gene Ontology (GO) terms for *O. fasciatus* v1.1 reference**  
23 **genome assembly<sup>26</sup> annotated genes.**

24

25 **Supplementary Table 8 Significantly enriched GO terms for the intersections**  
26 **between Differentially Methylated Genes (DMG), Similarly Methylated Genes**  
27 **(SMG), Differentially Expressed Genes (DEG), and non-Differentially Expressed**  
28 **Genes (non-DEG).**

29
